# Supplementary material for: Highly efficient oxidative cleavage of lignin β-O-4 linkages via synergistic Co-CoOx/N-doped carbon and recyclable hexaniobate catalysis
Source: Royal Society of Chemistry journal article supplement (doi:10.1039/d4gc05120c), 2024-12-10
Supplement: d4gc05120c1.pdf [file d4gc05120c1.pdf]

## Electronic Supporting Information

# Highly efficient oxidative cleavage of lignin $\beta$ -O-4 linkages via synergistic Co-CoO<sub>x</sub>/N-doped carbon and recyclable hexaniobate catalysis

Jie Li,<sup>a</sup> Pengpeng Shao,<sup>a</sup> Weijie Geng,<sup>a</sup> Peng Lei,<sup>a</sup> Jing Dong,<sup>b</sup> Yingnan Chi<sup>\*a</sup> and

Changwen Hu<sup>a</sup>

<sup>a</sup> Key Laboratory of Cluster Science Ministry of Education, Beijing Key Laboratory of Photoelectronic/Electrophotonic Conversion Materials, School of Chemistry and Chemical Engineering, Beijing Institute of Technology, Beijing 100081, P.R. China

<sup>b</sup> College of Chemistry and Materials Engineering, Beijing Technology and Business University, Beijing 100048, P.R. China

\*Corresponding author ([chiyingnan7887@bit.edu.cn](mailto:chiyingnan7887@bit.edu.cn))

# Contents

|                                                                                                                                                                                                                                                                            |    |
|----------------------------------------------------------------------------------------------------------------------------------------------------------------------------------------------------------------------------------------------------------------------------|----|
| Catalyst Characterization .....                                                                                                                                                                                                                                            | 4  |
| Preparation of Lignin $\beta$ -O-4 Model Compounds.....                                                                                                                                                                                                                    | 4  |
| Preparation of organosolv birch lignin.....                                                                                                                                                                                                                                | 6  |
| Supplementary experimental results.....                                                                                                                                                                                                                                    | 7  |
| Table S1. Different catalysts for the oxidative cleavage of $\beta$ -O-4 alcohol under aerobic conditions. ....                                                                                                                                                            | 7  |
| Table S2. Different catalysts for the oxidative cleavage of $\beta$ -O-4 ketone under aerobic conditions. ....                                                                                                                                                             | 8  |
| Table S3. Oxidative cleavage of PP-ol catalyzed by different catalysts. <sup>a</sup> .....                                                                                                                                                                                 | 9  |
| Table S4. Influence of KNb <sub>6</sub> amount and different bases on the cleavage of PP-one. ....                                                                                                                                                                         | 10 |
| Scheme S1. The preparation of Co-CoO <sub>x</sub> NPs/N-doped carbon. ....                                                                                                                                                                                                 | 11 |
| Figure S1. The optimization of reaction conditions by adjusting CoMA/C <sub>900</sub> amount. ....                                                                                                                                                                         | 11 |
| Figure S2. The optimization of reaction conditions by various oxygen pressure. ...                                                                                                                                                                                         | 11 |
| Figure S3. TEM image, the particle-size distribution histogram and HRTEM image of Co <sup>0</sup> , CoO and/or Co <sub>3</sub> O <sub>4</sub> NPs of (a) CoMA/C <sub>700</sub> , (b) CoMA/C <sub>800</sub> , (c) CoMA/C <sub>900</sub> , (d) CoMA/C <sub>1000</sub> . .... | 12 |
| Figure S4. (a) N 1s and (b) C 1s XPS spectra of N-doped carbon support in CoMA/C <sub>900</sub> . ....                                                                                                                                                                     | 13 |
| Figure S5. N <sub>2</sub> sorption isotherms of CoMA/C <sub>900</sub> . ....                                                                                                                                                                                               | 13 |
| Figure S6. The PXRD patterns of CoMA/C <sub>900</sub> , CoMA/C <sub>900</sub> -H <sup>+</sup> and CoMA/C <sub>900</sub> -350. .                                                                                                                                            | 13 |
| Table S5. Radical trapping experiments for the catalytic cleavage of PP-ol.....                                                                                                                                                                                            | 13 |
| Figure S7. EPR patterns in the presence of CoMA/C <sub>900</sub> -H <sup>+</sup> and CoMA/C <sub>900</sub> -350 with DMPO as the trapping agent. ....                                                                                                                      | 14 |
| Table S6. The effect of solvent on the oxidative cleavage of PP-ol. ....                                                                                                                                                                                                   | 14 |
| Figure S8. The linear fit of $\ln(C_t/C_0)$ against the reaction time (a) PP-ol and (b) PP-ol- $\alpha$ -d <sub>1</sub> and (c) PP-ol- $\beta$ -d <sub>2</sub> catalyzed by CoMA/C <sub>900</sub> -KNb <sub>6</sub> . ....                                                 | 15 |
| Figure S9. The measurement of apparent activation energy at 60, 70, and 80 °C. The data obtained fit to the first order kinetic.....                                                                                                                                       | 15 |

|                                                                                                                                                                                                           |    |
|-----------------------------------------------------------------------------------------------------------------------------------------------------------------------------------------------------------|----|
| Figure S10. FT-IR spectra of PP-ol, fresh and immersed KNb <sub>6</sub> with the wavenumber range of (a) 4000-400 cm <sup>-1</sup> and (b) 1400-400 cm <sup>-1</sup> .....                                | 16 |
| Figure S11. The possible role of KNb <sub>6</sub> during the process of MeOH attacking C <sub>α</sub> site of methyl benzoylformate (2c). .....                                                           | 16 |
| Figure S12. The detection of CO <sub>2</sub> produced during reaction through a clear limewater. ....                                                                                                     | 16 |
| Figure S13. (a) Leaching test for the conversion of PP-ol to aromatic monomers over CoMA/C <sub>900</sub> -KNb <sub>6</sub> . (b) Recycling test. (c) FT-IR and (d) PXRD of the fresh and used catalysts. |    |
| Figure S14. The detection of CO <sub>2</sub> by a clear limewater when vanillyl ester and vanillic acid as substrate. ....                                                                                | 17 |
| Figure S15. 2D HSQC NMR spectra (in DMSO- <i>d</i> <sub>6</sub> ) of (a) organosolv birch lignin and (b) catalytic cleavage reaction. ....                                                                | 18 |
| Figure S16. The distribution of aromatic monomeric products for dioxasolv birch lignin. ....                                                                                                              | 19 |
| <sup>1</sup> H NMR Spectra of Lignin β-O-4 Model Compounds.....                                                                                                                                           | 19 |
| References.....                                                                                                                                                                                           | 22 |

## Catalyst Characterization

Powder X-ray diffraction (PXRD) data were collected on a Rigaku MiniFlex 600 diffractometer with a Cu-K $\alpha$  X-ray radiation source ( $\lambda = 1.54056 \text{ \AA}$ ). Fourier-transform infrared (FT-IR) spectra were recorded at the range 4000-400  $\text{cm}^{-1}$  on a Bruker ALPHA spectrometer. The Co content was measured by a ThermoCAP Q mass spectrometry. The X-ray photoelectron spectroscopy (XPS) was conducted by the Thermo scientific K $\alpha$  XPS equipped with a monochromatic Al K $\alpha$  X-ray source (1486.6 eV). The morphologies of catalysts were observed on JEM-2010 transmission electron microscope. Electric paramagnetic resonance (EPR) signals were captured on a Bruker EMXplus. Two-dimensional Nuclear Magnetic Resonance Heteronuclear Single Quantum Coherence (2D NMR HSQC) spectra were recorded on a Bruker AVANCE III HD 700 MHz spectrometer. Gel permeation chromatography (GPC) was performed with a Waters 1515 chromatography system equipped with an Agilent PL1110 column. Gas chromatography-mass spectrometry (GC-MS) was used to identify substrate and products on an Agilent 7890A GC/5975C MS.

## Preparation of Lignin $\beta$ -O-4 Model Compounds

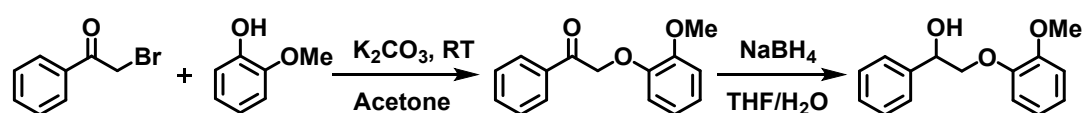

Synthesis of 2-(2-Methoxyphenoxy)-1-phenylethanol<sup>[1]</sup>: (i) To a solution of guaiacol (0.9 g, 7.3 mmol) in 15 mL acetone, K<sub>2</sub>CO<sub>3</sub> (1.04 g, 7.5 mmol) was added and stirred for 30 min. Then, 2-bromoacetophenone (1.4 g, 7 mmol) was added. After reaction for 24 h, the filtrate was collected and concentrated by rotary evaporator in vacuum. The solid was added into EtOAc, washed with 5% NaOH solution and water. The organic phase was collected, dried over anhydrous Na<sub>2</sub>SO<sub>4</sub> and evaporated in vacuum. The obtained powder was recrystallized in ethanol.

(ii) The above powder (0.212 g, 1 mmol) was dissolved completely into a mixed solution of THF/H<sub>2</sub>O (4:1 volume ratio, 5 mL), and NaBH<sub>4</sub> (76 mg, 2 mmol) was added

and stirred at room temperature. After 1 h, excess saturated  $\text{NH}_4\text{Cl}$  aqueous solution (3 mL) was poured into the reaction mixture. Then, the liquid was extracted with EtOAc, washed with brine and dried over anhydrous  $\text{Na}_2\text{SO}_4$ . The organic phase was concentrated to obtain 2-(2-Methoxyphenoxy)-1-phenylethanol. Similarly, the synthetic steps of other methoxy group substituted 2-Phenoxy-1-phenylethanol were the same as that of 2-(2-Methoxyphenoxy)-1-phenylethanol, except that the starting materials were different.

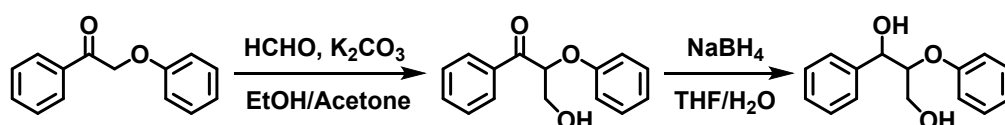

Synthesis of 2-phenoxy-1-phenylpropane-1,3-diol<sup>[1]</sup>: 2-phenoxyacetophenone was prepared by the above similar method. A mixed EtOH/acetone (1:1, 30 mL) solution containing 2-phenoxyacetophenone (1.27 g, 6.0 mmol), HCHO (36 wt%, 11 mmol) and  $\text{K}_2\text{CO}_3$  (0.9 g, 6.5 mmol) was stirred for 4 h and evaporated. The residue was dissolved in EtOAc and washed with water and brine. The organic phase was concentrated and purified by column chromatography with petroleum ether/EtOAc. Then the ketone, 1-phenyl-3-hydroxy-2-phenoxy propan-1-one, was reduced with  $\text{NaBH}_4$  in THF/ $\text{H}_2\text{O}$  to obtain diol.

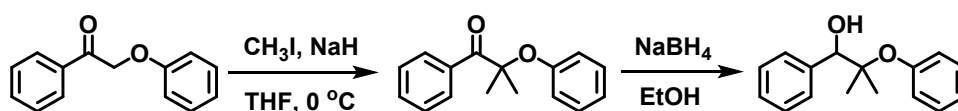

Synthesis of 2-methyl-2-phenoxy-1-phenylpropan-1-ol<sup>[2]</sup>: 2-phenoxyacetophenone (1.0 g, 4.8 mmol) was added to a three-neck bottle with anhydrous THF (26 mL). The bottle was placed in an ice bath, and in an Ar atmosphere NaH (0.64 g, 15.9 mmol, 60 wt% in mineral oil) was slowly added under stirring. After 15 min,  $\text{CH}_3\text{I}$  (0.99 g, 15.9 mmol) was dropped slowly. The mixture was heated at 40 °C for 4 h, followed by 30 mL of water and EtOAc. The extracted organic phase was washed with brine, dried over anhydrous  $\text{Na}_2\text{SO}_4$ , evaporated by rotary, and purified by column chromatography. Finally, 2-methyl-2-phenoxy-1-phenylpropan-1-ol was obtained by a similar reduction process in EtOH solvent.

### **Preparation of organosolv birch lignin<sup>[3]</sup>**

A 500 mL round-bottom flask was charged with 1,4-dioxane (144 mL) and the dilute HCl (2 mol/L, 16 mL), and birch sawdust (20 g) was added. The mixture was heated to 80 °C under argon atmosphere for 1 h. The filtrate was collected and concentrated in vacuum. The grume was fully dissolved in acetone/water (9:1, 25 mL) and precipitated by the slowly addition into 250 mL of water. After being dried in air, the crude lignin was redissolved in acetone/methanol (9:1, 25 mL) and gradually added into Et<sub>2</sub>O (200 mL) with a quick stir. The organosolv birch lignin was collected by filtration and dried in air, affording 1.47 g solid sample with a yield of 7.35%. Lignin purity was measured by national renewable energy laboratory (NREL) method with the acid insoluble lignin content of 73%. This exacted lignin was used in subsequent experiments without further processing.

## Supplementary experimental results

**Table S1.** Different catalysts for the oxidative cleavage of  $\beta$ -O-4 alcohol under aerobic conditions.

| entry | catalysts                                                                                                                                                                     | base catalysts                            | reaction system | O <sub>2</sub>       | temp. (°C) | time (h) | conv. (%) | yield of phenols (%) | yield of benzoates (%) | ref. |
|-------|-------------------------------------------------------------------------------------------------------------------------------------------------------------------------------|-------------------------------------------|-----------------|----------------------|------------|----------|-----------|----------------------|------------------------|------|
| 1     | (i) AcNH-TEMPO/<br>HCl/HNO <sub>3</sub>                                                                                                                                       | 0.001 equiv.<br>NaOH                      | Homo.           | 1 atm O <sub>2</sub> | 45         | 24       | 96        | -                    | -                      | [4]  |
|       | (ii) H <sub>2</sub> O <sub>2</sub> -NaOH                                                                                                                                      |                                           |                 | -                    | 50         | 10       | 100       | 42                   | -                      |      |
| 2     | AuPd-CTFs                                                                                                                                                                     | -                                         | Heter.          | 0.5 MPa              | 160        | 4        | 96        | 49                   | 17                     | [1]  |
| 3     | Pd/CeO <sub>2</sub>                                                                                                                                                           | -                                         | Heter.          | 0.1 MPa              | 185        | 24       | 64        | 48                   | 14                     | [5]  |
| 4     | Au/CeO <sub>2</sub>                                                                                                                                                           | -                                         | Heter.          | 1 MPa                | 180        | 4        | 72        | 45                   | 31                     | [6]  |
| 5     | RuMo/rGO                                                                                                                                                                      | 0.1 M NaOH                                | Heter.          | 0.3 MPa              | 100        | 12       | 94        | 49                   | -                      | [7]  |
| 6     | VB <sub>12</sub> /C-900                                                                                                                                                       | 0.2 equiv. K <sub>2</sub> CO <sub>3</sub> | Heter.          | 0.1 MPa              | 80         | 24       | 96        | 96                   | 73                     | [2]  |
| 7     | Co-N-C                                                                                                                                                                        | 1 equiv. NaOH                             | Heter.          | 1 MPa air            | 150        | 4        | 93        | 69                   | 86                     | [8]  |
| 8     | Co@CN                                                                                                                                                                         | -                                         | Heter.          | 0.1 MPa              | 110        | 12       | -         | 65                   | 31                     | [9]  |
| 9     | (i) VOSO <sub>4</sub> /TEMPO                                                                                                                                                  | 0.2 equiv. Phen                           | Homo.           | 0.4 MPa              | 100        | 12       | 82        | -                    | -                      | [10] |
|       | (ii) Cu(OAc) <sub>2</sub> /Phen                                                                                                                                               |                                           |                 |                      | 80         | 3        | 94        | 85                   | -                      |      |
| 10    | Bim-V-2                                                                                                                                                                       | -                                         | Homo.           | 0.5 MPa              | 120        | 10       | 97        | 92                   | 32                     | [11] |
| 11    | (dipic)V(O)O'Pr                                                                                                                                                               | -                                         | Homo.           | Air                  | 100        | 168      | 95        | 77                   | -                      | [12] |
| 12    | [Cu <sup>I</sup> (bbi)] <sub>2</sub> [[Cu <sup>I</sup> (bbi)] <sub>2</sub> -<br>V <sup>IV</sup> <sub>2</sub> V <sup>V</sup> <sub>8</sub> O <sub>26</sub> }]·2H <sub>2</sub> O | -                                         | Heter.          | 0.4 MPa              | 100        | 12       | >99       | 60                   | 90                     | [13] |
| 13    | [MIMPS] <sub>2</sub> H <sub>4</sub> P <sub>2</sub> Mo <sub>18</sub> O <sub>62</sub>                                                                                           | -                                         | Homo.           | 0.5 MPa              | 140        | 10       | 95        | 83.5                 | -                      | [14] |
| 14    | H <sub>5</sub> PMo <sub>10</sub> V <sub>2</sub> O <sub>40</sub> /BMIMSO <sub>3</sub>                                                                                          | -                                         | Homo.           | 1 atm O <sub>2</sub> | 130        | 10       | 100       | 80                   | -                      | [15] |

|    |                                                                   |                             |        |         |     |   |      |      |     |           |
|----|-------------------------------------------------------------------|-----------------------------|--------|---------|-----|---|------|------|-----|-----------|
| 15 | BetH <sub>5</sub> V <sub>2</sub> Mo <sub>18</sub> O <sub>62</sub> | -                           | Homo.  | 0.8 MPa | 140 | 8 | 92.9 | 86.3 | 1.8 | [16]      |
| 16 | CoMA/C <sub>900</sub> -KNb <sub>6</sub>                           | 0.2 equiv. KNb <sub>6</sub> | Heter. | 0.2 MPa | 100 | 3 | 99   | 99   | 98  | This work |

Heter. = Heterogeneous; Homo. = Homogeneous; temp. = temperature; conv. = conversion

**Table S2.** Different catalysts for the oxidative cleavage of  $\beta$ -O-4 ketone under aerobic conditions.

| entry | catalysts                                          | base catalysts                             | reaction system | O <sub>2</sub> | temp. (°C) | time (h) | conv. (%) | yield of phenols (%) | yield of benzoates (%) | ref.      |
|-------|----------------------------------------------------|--------------------------------------------|-----------------|----------------|------------|----------|-----------|----------------------|------------------------|-----------|
| 1     | KNb <sub>6</sub> -Cu/C <sub>3</sub> N <sub>4</sub> | 0.058 equiv. KNb <sub>6</sub>              | Heter.          | 0.5 MPa        | 80         | 12       | 96        | 90                   | 10                     | [17]      |
| 2     | CTF- <i>p</i> DCB-1                                | -                                          | Heter.          | 0.5 MPa        | 140        | 2        | > 99      | 45                   | 15                     | [18]      |
| 3     | KO <sub>x</sub> -CTFs                              | -                                          | Heter.          | 0.5 MPa        | 120        | 2        | 62        | 52                   | 8                      | [3]       |
| 4     | Cu(OAc) <sub>2</sub>                               | 2 equiv. BF <sub>3</sub> ·OEt <sub>2</sub> | Homo.           | 0.4 MPa        | 90         | 2        | 86        | 39                   | 51                     | [19]      |
| 5     | CuCl                                               | 4 equiv. NaOH                              | Homo.           | 1 atm air      | 30         | 5.5      | 97        | 89                   | -                      | [20]      |
| 6     | Ce-Cu/MFI                                          | -                                          | Heter.          | 1.0 MPa        | 150        | 24       | 100       | -                    | 41                     | [21]      |
| 7     | Fe-N-C                                             | -                                          | Heter.          | 0.3 MPa        | 140        | 4        | 94        | 93                   | 62                     | [22]      |
| 8     | CoMA/C <sub>900</sub> -KNb <sub>6</sub>            | 0.2 equiv. KNb <sub>6</sub>                | Heter.          | 0.2 MPa        | 80         | 0.25     | 99        | 99                   | 96                     | This work |

Heter. = Heterogeneous; Homo. = Homogeneous; temp. = temperature; conv. = conversion



**Table S3.** Oxidative cleavage of PP-ol catalyzed by different catalysts. <sup>a</sup>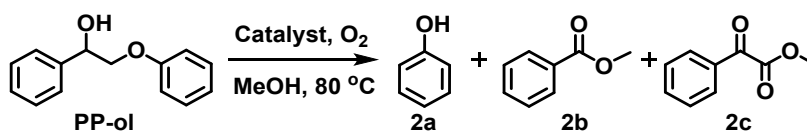

| Entry | Catalyst                                                | Temp. (°C) | Conv. (%) <sup>b</sup> | Yield (%) <sup>b</sup> |       |    |
|-------|---------------------------------------------------------|------------|------------------------|------------------------|-------|----|
|       |                                                         |            |                        | 2a                     | 2b    | 2c |
| 1     | Blank                                                   | 80         | <1                     | trace                  | trace | -  |
| 2     | KNb <sub>6</sub>                                        | 80         | 14                     | 12                     | 11    | -  |
| 3     | CoMA/C <sub>900</sub>                                   | 80         | 37                     | 36                     | 24    | 11 |
| 4     | CoMA/C <sub>900</sub> -KNb <sub>6</sub>                 | 80         | 90                     | 90                     | 89    | -  |
| 5     | CoMA/C <sub>900</sub> -KNb <sub>6</sub>                 | 40         | 30                     | 30                     | 27    | -  |
| 6     | CoMA/C <sub>900</sub> -KNb <sub>6</sub>                 | 60         | 53                     | 51                     | 52    | -  |
| 7     | CoMA/C <sub>900</sub> -KNb <sub>6</sub>                 | 100        | 99                     | 99                     | 98    | -  |
| 8     | CoMA/C <sub>900</sub> -KNb <sub>6</sub>                 | 120        | 99                     | 99                     | 99    | -  |
| 9     | MA/C <sub>900</sub> -KNb <sub>6</sub>                   | 80         | 16                     | 16                     | 15    | 1  |
| 10    | CoMA/C <sub>700</sub> -KNb <sub>6</sub>                 | 80         | 47                     | 45                     | 46    | -  |
| 11    | CoMA/C <sub>800</sub> -KNb <sub>6</sub>                 | 80         | 57                     | 56                     | 41    | 13 |
| 12    | CoMA/C <sub>1000</sub> -KNb <sub>6</sub>                | 80         | 74                     | 73                     | 66    | -  |
| 13    | Co powder-KNb <sub>6</sub>                              | 80         | 12                     | 11                     | 12    | -  |
| 14    | CoO-KNb <sub>6</sub>                                    | 80         | 10                     | 9                      | 9     | -  |
| 15    | Co <sub>3</sub> O <sub>4</sub> -KNb <sub>6</sub>        | 80         | 8                      | 6                      | 7     | -  |
| 16    | CoMA/C <sub>900</sub> -350-KNb <sub>6</sub>             | 80         | 11                     | 8                      | 10    | -  |
| 17    | CoMA/C <sub>900</sub> -H <sup>+</sup> -KNb <sub>6</sub> | 80         | 13                     | 10                     | 11    | -  |

<sup>a</sup> Reaction conditions: PP-ol (0.05 mmol), CoMA/C<sub>900</sub>-KNb<sub>6</sub> (40 mg, m : m = 5 : 3), 2.5 mL MeOH, 80 °C, 0.2 MPa O<sub>2</sub>, t = 3 h, biphenyl as the internal standard. <sup>b</sup> Conversion and yield were monitored by GC with FID detector.

**Table S4.** Influence of KNb<sub>6</sub> amount and different bases on the cleavage of PP-one. <sup>a</sup>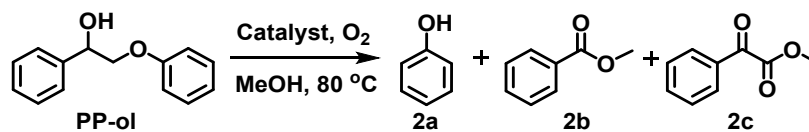

| Entry | Catalyst                                                        | Conv. (%) <sup>b</sup> | Yield (%) <sup>b</sup> |    |    |
|-------|-----------------------------------------------------------------|------------------------|------------------------|----|----|
|       |                                                                 |                        | 2a                     | 2b | 2c |
| 1     | CoMA/C <sub>900</sub> -KNb <sub>6</sub> (5:0)                   | 37                     | 36                     | 24 | 11 |
| 2     | CoMA/C <sub>900</sub> -KNb <sub>6</sub> (5:1)                   | 71                     | 67                     | 60 | 10 |
| 3     | CoMA/C <sub>900</sub> -KNb <sub>6</sub> (5:2)                   | 86                     | 86                     | 75 | 11 |
| 4     | CoMA/C <sub>900</sub> -KNb <sub>6</sub> (5:3)                   | 90                     | 90                     | 89 | -  |
| 5     | CoMA/C <sub>900</sub> -KNb <sub>6</sub> (5:4)                   | 93                     | 86                     | 92 | -  |
| 6     | CoMA/C <sub>900</sub> -NaOH (0.2 eq.)                           | 70                     | 68                     | 62 | 8  |
| 7     | CoMA/C <sub>900</sub> -KOH (0.2 eq.)                            | 74                     | 73                     | 50 | 19 |
| 8     | CoMA/C <sub>900</sub> -K <sub>2</sub> CO <sub>3</sub> (0.2 eq.) | 70                     | 70                     | 59 | 7  |
| 9     | CoMA/C <sub>900</sub> -KOAc (0.2 eq.)                           | 42                     | 32                     | 18 | 11 |
| 10    | CoMA/C <sub>900</sub> -Prydine (0.2 eq.)                        | 36                     | 35                     | 28 | 8  |
| 11    | CoMA/C <sub>900</sub> -Et <sub>3</sub> N (0.2 eq.)              | 48                     | 45                     | 24 | 21 |
| 12    | CoMA/C <sub>900</sub> -MgO (0.2 eq.)                            | 41                     | 33                     | 25 | 12 |
| 13    | CoMA/C <sub>900</sub> -CaO (0.2 eq.)                            | 62                     | 57                     | 48 | 10 |
| 14    | CoMA/C <sub>900</sub> -Nb <sub>2</sub> O <sub>5</sub> (0.2 eq.) | 40                     | 39                     | 27 | 10 |

<sup>a</sup> Reaction conditions: PP-ol (0.05 mmol), CoMA/C<sub>900</sub> (25 mg), base (0.2 eq.), 2.5 mL MeOH, 80 °C, 0.2 MPa O<sub>2</sub>, t = 3 h. <sup>b</sup> Conversion and yield were monitored by GC with FID detector.

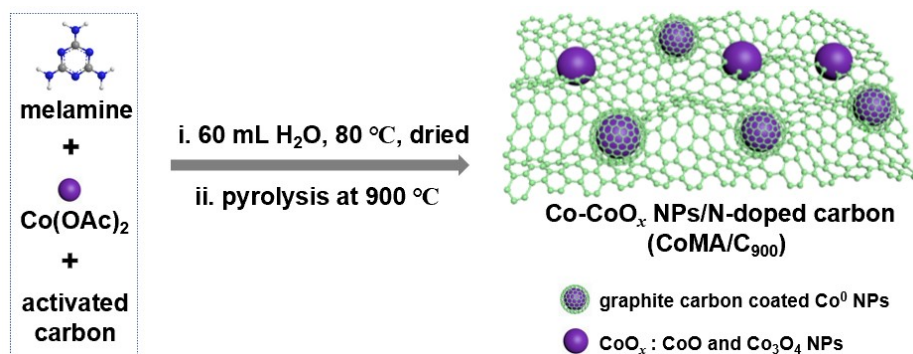

**Scheme S1.** The preparation of Co-CoO<sub>x</sub> NPs/N-doped carbon.

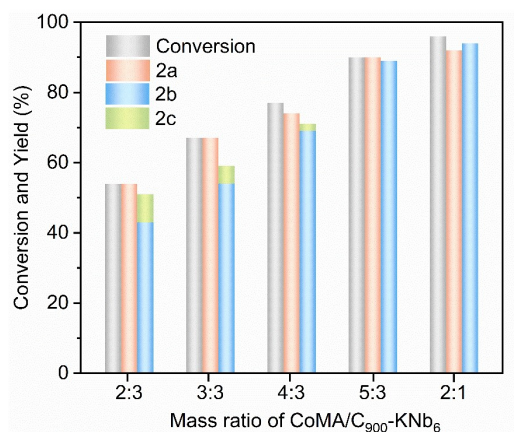

**Figure S1.** The optimization of reaction conditions by adjusting CoMA/C<sub>900</sub> amount.

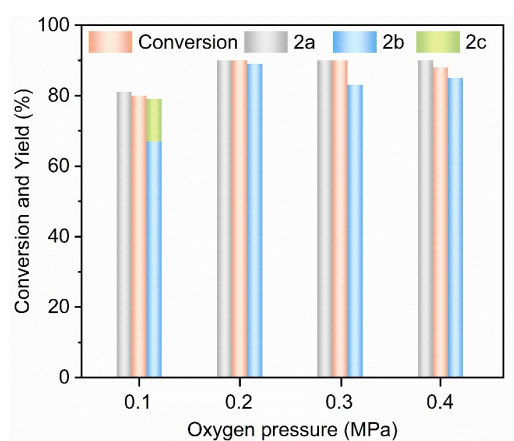

**Figure S2.** The optimization of reaction conditions by various oxygen pressure.

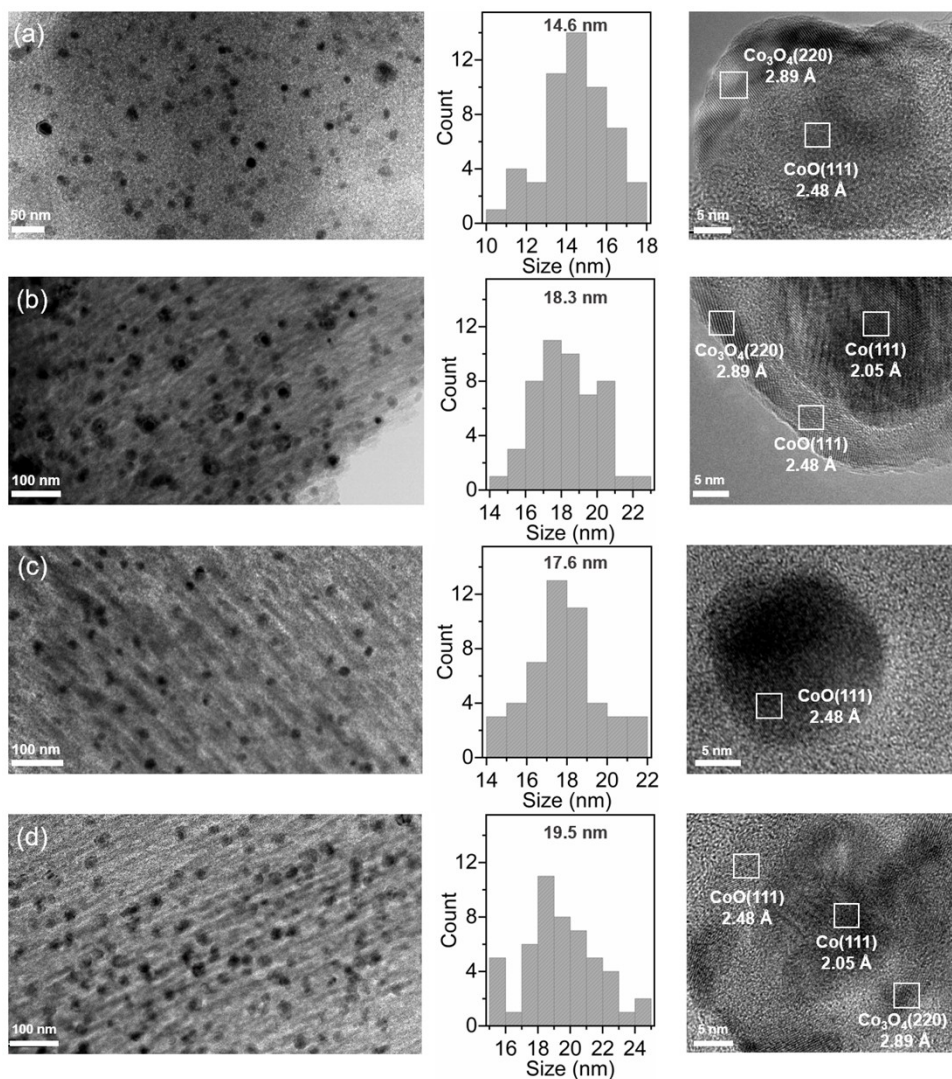

**Figure S3.** TEM image, the particle-size distribution histogram and HRTEM image of Co<sup>0</sup>, CoO and/or Co<sub>3</sub>O<sub>4</sub> NPs of (a) CoMA/C<sub>700</sub>, (b) CoMA/C<sub>800</sub>, (c) CoMA/C<sub>900</sub>, (d) CoMA/C<sub>1000</sub>.

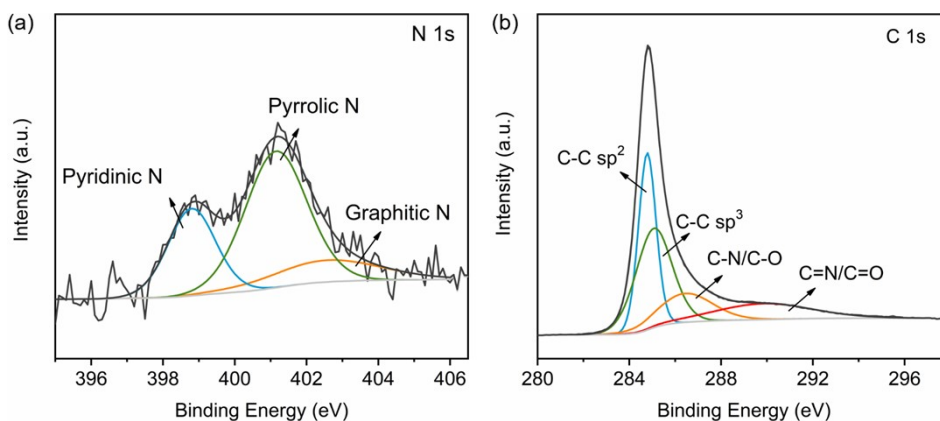

**Figure S4.** (a) N 1s and (b) C 1s XPS spectra of N-doped carbon support in CoMA/C<sub>900</sub>.

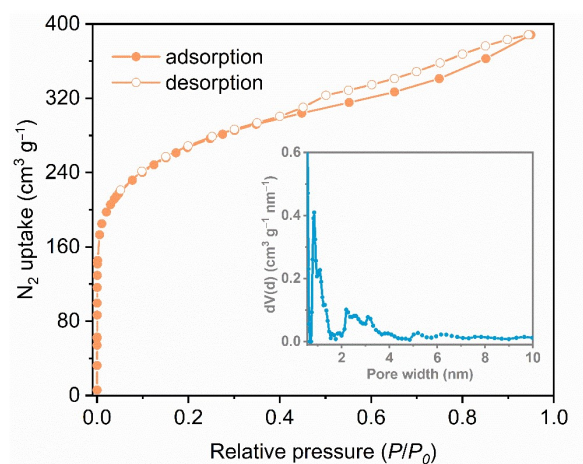

**Figure S5.** N<sub>2</sub> sorption isotherms of CoMA/C<sub>900</sub>. Inset: Pore size distributions of CoMA/C<sub>900</sub>.

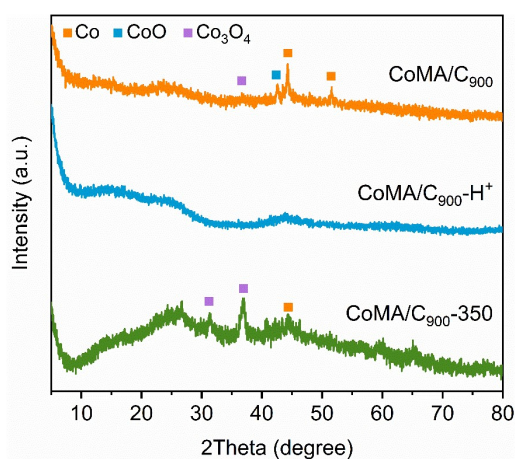

**Figure S6.** The PXRD patterns of CoMA/C<sub>900</sub>, CoMA/C<sub>900</sub>-H<sup>+</sup> and CoMA/C<sub>900</sub>-350.

**Table S5.** Radical trapping experiments for the catalytic cleavage of PP-ol.<sup>a</sup>

| Entry          | Radical scavenger  | Conv. (%) <sup>b</sup> | Yield (%) <sup>b</sup> |     |
|----------------|--------------------|------------------------|------------------------|-----|
|                |                    |                        | 2a                     | 2b  |
| 1              | No                 | 90                     | 90                     | 89  |
| 2 <sup>c</sup> | No                 | < 1                    | < 1                    | < 1 |
| 3              | Ph <sub>2</sub> NH | 20                     | 20                     | 16  |
| 4              | BQ                 | 3                      | 3                      | 3   |
| 5              | BHT                | 20                     | 20                     | 16  |

<sup>a</sup> Reaction conditions: PP-ol (0.05 mmol), CoMA/C<sub>900</sub>-KNb<sub>6</sub> (40 mg, m : m = 5 : 3), 2.5 mL MeOH, 80 °C, 0.2 MPa O<sub>2</sub>, t = 3 h. <sup>b</sup> Conversion and yield were monitored by GC with FID detector. <sup>c</sup> 0.2 MPa N<sub>2</sub>.

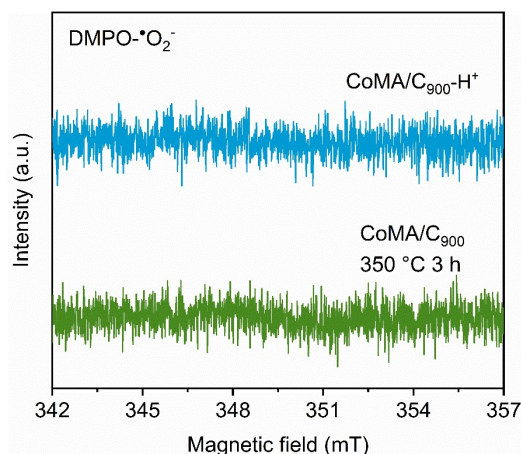

**Figure S7.** EPR patterns in the presence of CoMA/C<sub>900</sub>-H<sup>+</sup> and CoMA/C<sub>900</sub>-350 with DMPO as the trapping agent.

**Table S6.** The effect of solvent on the oxidative cleavage of PP-ol.<sup>a</sup>

| Entry | solvent            | Conv. (%) <sup>b</sup> | Yield (%) <sup>b</sup> |        |
|-------|--------------------|------------------------|------------------------|--------|
|       |                    |                        | 2a                     | esters |
| 1     | MeOH               | 90                     | 90                     | 89     |
| 2     | EtOH               | 54                     | 52                     | 53     |
| 3     | <i>i</i> -PrOH     | 37                     | 36                     | 31     |
| 4     | <i>t</i> -BuOH     | 12                     | 12                     | 11     |
| 5     | CH <sub>3</sub> CN | 9                      | 5                      | -      |
| 6     | THF                | 7                      | 5                      | -      |
| 7     | Diox               | 5                      | 5                      | -      |

<sup>a</sup> Reaction conditions: PP-ol (0.05 mmol), CoMA/C<sub>900</sub>-KNb<sub>6</sub> (40 mg, m : m = 5 : 3), 2.5 mL solvent, 80 °C, 0.2 MPa O<sub>2</sub>, t = 3 h. <sup>b</sup> Conversion and yield were monitored by GC with FID detector.

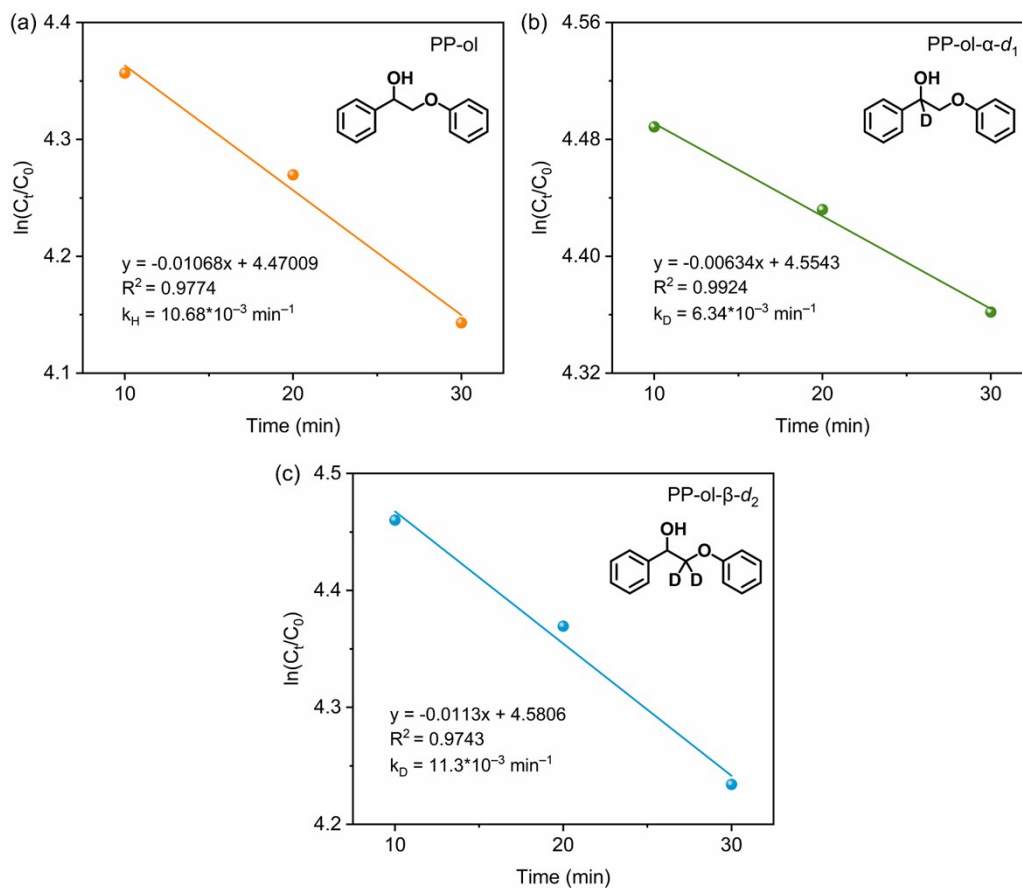

**Figure S8.** The linear fit of  $\ln(C_t/C_0)$  against the reaction time (a) PP-ol and (b) PP-ol- $\alpha$ - $d_1$  and (c) PP-ol- $\beta$ - $d_2$  catalyzed by CoMA/C<sub>900</sub>-KNb<sub>6</sub>.

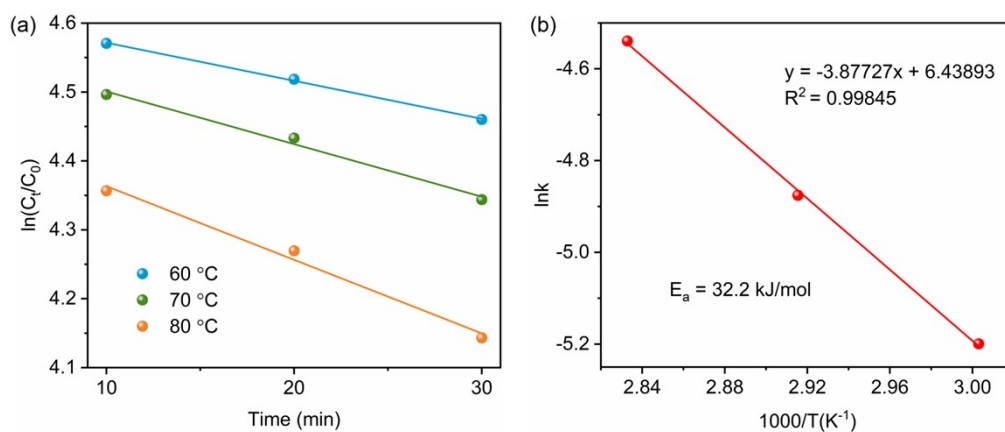

**Figure S9.** The measurement of apparent activation energy at 60, 70, and 80 °C. The data obtained fit to the first order kinetic.

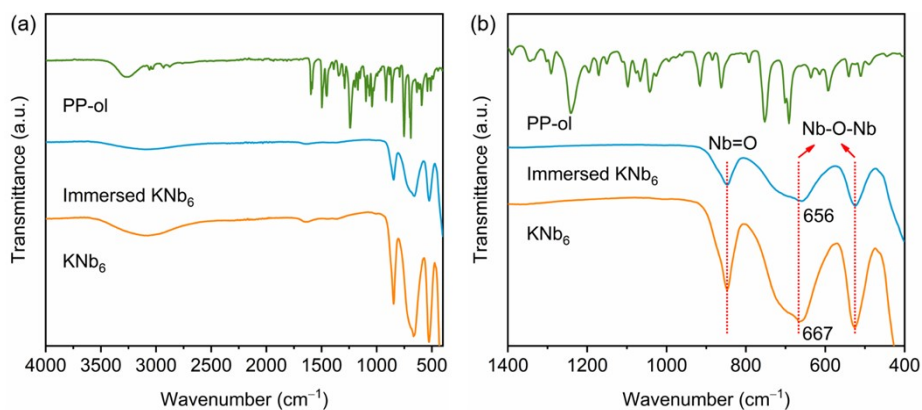

**Figure S10.** FT-IR spectra of PP-ol, fresh and immersed  $\text{KNb}_6$  with the wavenumber range of (a)  $4000\text{-}400\text{ cm}^{-1}$  and (b)  $1400\text{-}400\text{ cm}^{-1}$ .  $\text{KNb}_6$  was immersed in a minimal amount of methanol containing PP-ol, followed by separation, washing, and drying of the  $\text{KNb}_6$ .

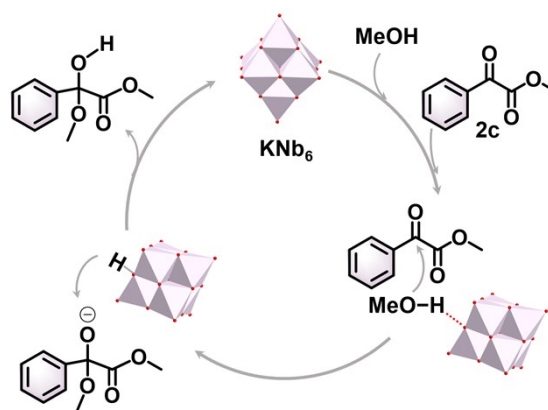

**Figure S11.** The possible role of  $\text{KNb}_6$  during the process of MeOH attacking  $\text{C}_\alpha$  site of methyl benzoylformate (**2c**).

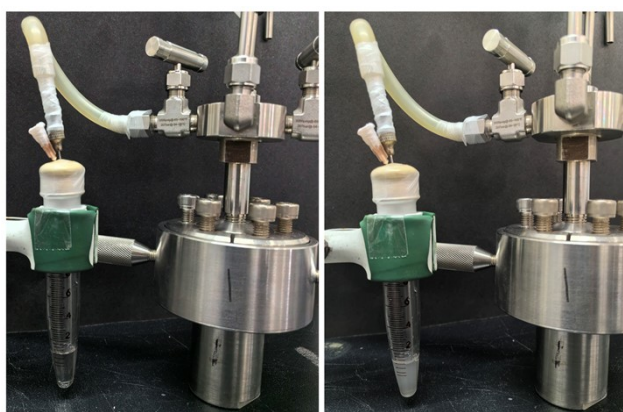

**Figure S12.** The detection of  $\text{CO}_2$  produced during reaction through a clear limewater.



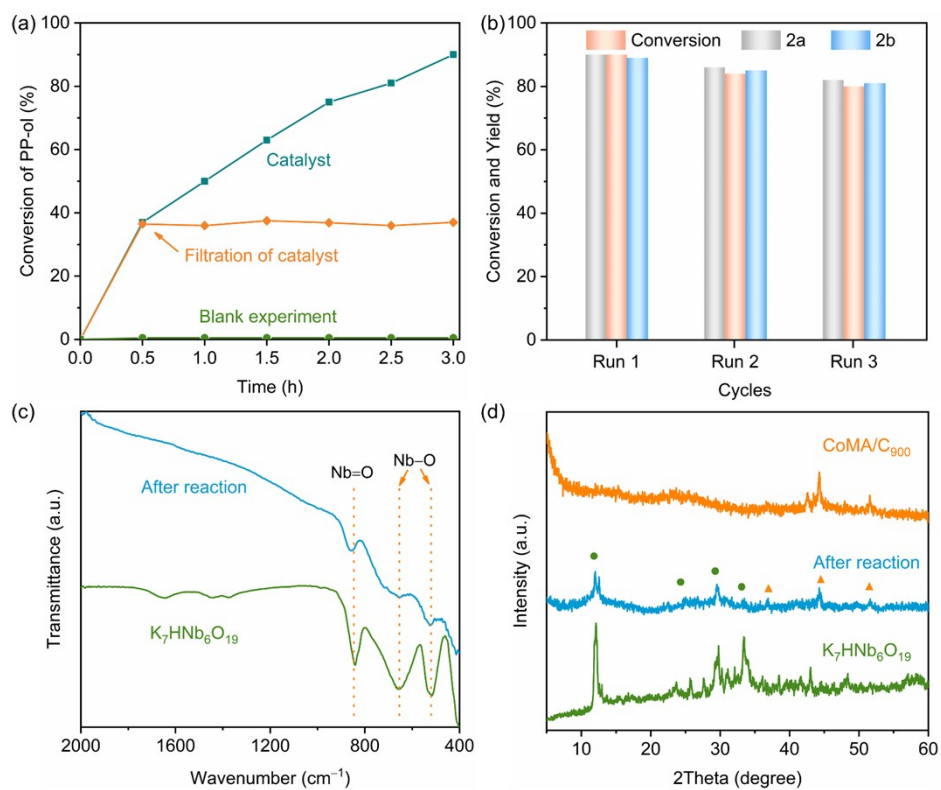

**Figure S13.** (a) Leaching test for the conversion of PP-ol to aromatic monomers over CoMA/C<sub>900</sub>-KNb<sub>6</sub>. (b) Recycling test. (c) FT-IR and (d) PXRD of the fresh and used catalysts.

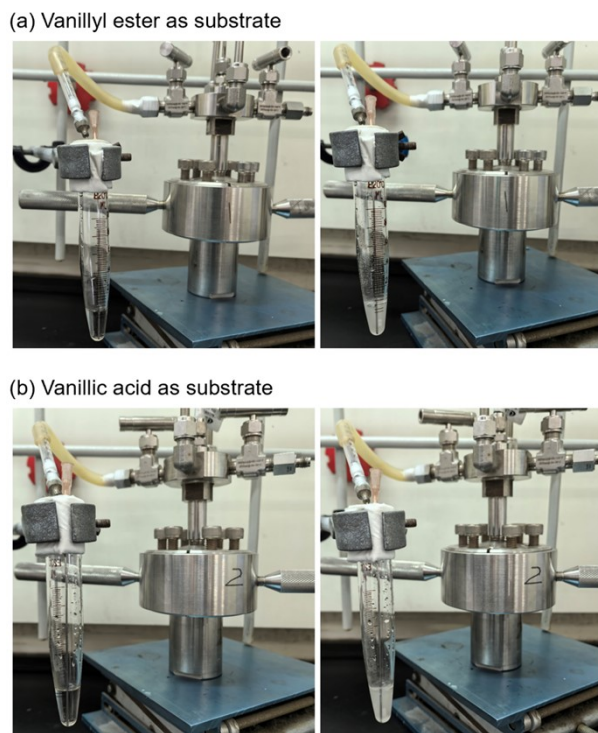

**Figure S14.** The detection of CO<sub>2</sub> by a clear limewater using vanillyl ester and vanillic acid as substrate.

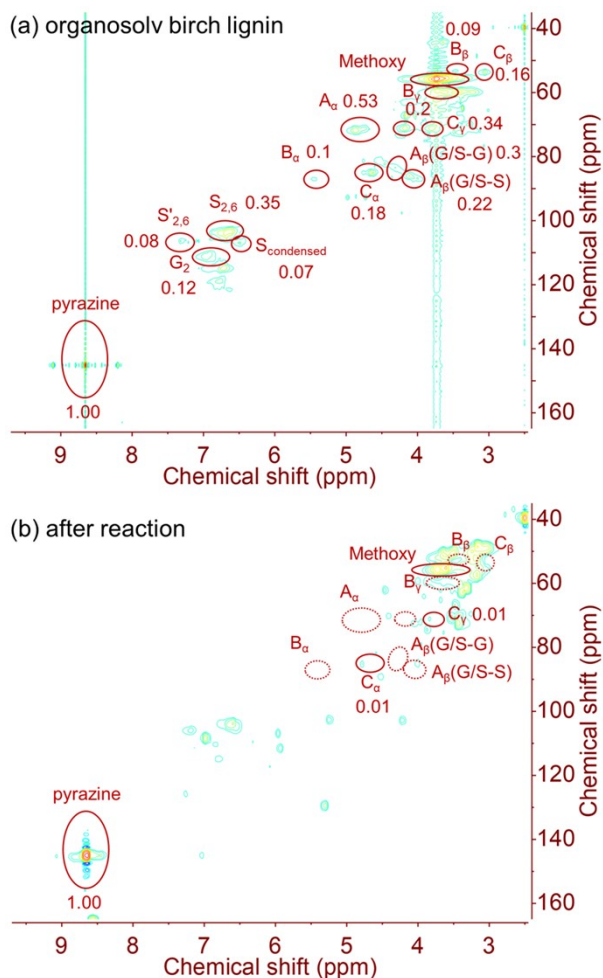

**Figure S15.** 2D HSQC NMR spectra (in DMSO- $d_6$ ) of (a) organosolv birch lignin and (b) catalytic cleavage reaction.

Before the 2D HSQC NMR test of dioxasolv birch lignin, to the DMSO- $d_6$  solution of dioxasolv birch lignin (50 mg), the pyrazine was added as an internal standard. And the H atoms' peak area of pyrazine is normalized as 1.00 according to the integral of  $^1\text{H}$  NMR. Thus, the integral peak areas of  $\beta$ -O-4 linkage ( $A_\alpha$ ,  $A_\beta$ ),  $\beta$ -5 linkage ( $B_\alpha$ ,  $B_\beta$ ,  $B_\gamma$ ), and  $\beta$ - $\beta$  linkage ( $C_\alpha$ ,  $C_\beta$ ,  $C_\gamma$ ), to internal standard were calculated as (0.53, 0.52), (0.1, 0.09, 0.2), and (0.18, 0.16, 0.34), according to the integral of  $^1\text{H}$  NMR of dioxasolv birch lignin. After oxidative depolymerization (dioxasolv birch lignin: 50 mg), the signals of  $\beta$ -O-4 linkage (A) and  $\beta$ -5 linkage (B) almost disappeared, suggesting that the  $\beta$ -O-4 linkage (A) and  $\beta$ -5 linkage (B) were completely converted. But the signal of the part of the  $\beta$ - $\beta$  linkages (C) was still observed, and the peak areas of both  $C_\alpha$  and  $C_\gamma$  to internal was calculated as 0.01. Thus, the conversions of  $C_\alpha$  and  $C_\gamma$  in  $\beta$ - $\beta$  linkages were calculated referred to internal:<sup>[3]</sup>  $100 \times [1 - 0.01 / ((0.18) \times (50/50))] = 94\%$  and  $100 \times [1 - 0.01 / ((0.34) \times (50/50))] = 97\%$ .

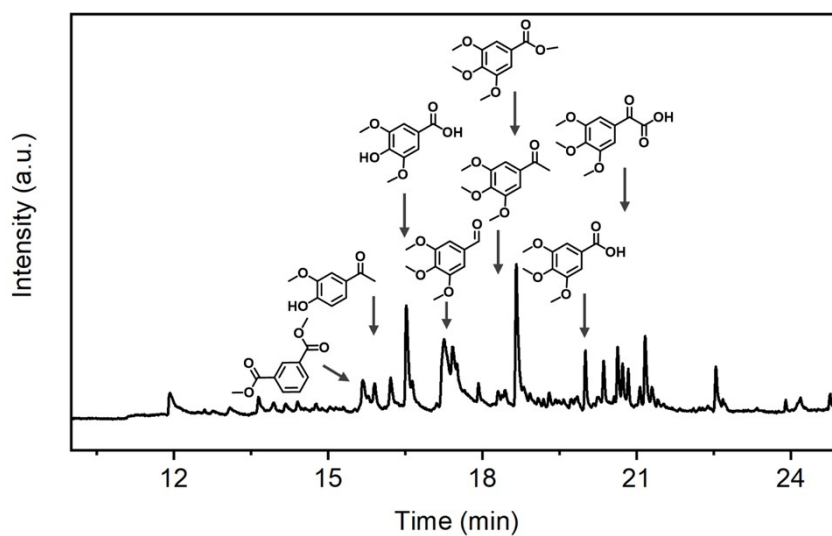

**Figure S16.** The distribution of aromatic monomeric products for dioxasolv birch lignin.

### $^1\text{H}$ NMR Spectra of Lignin $\beta\text{-O-4}$ Model Compounds

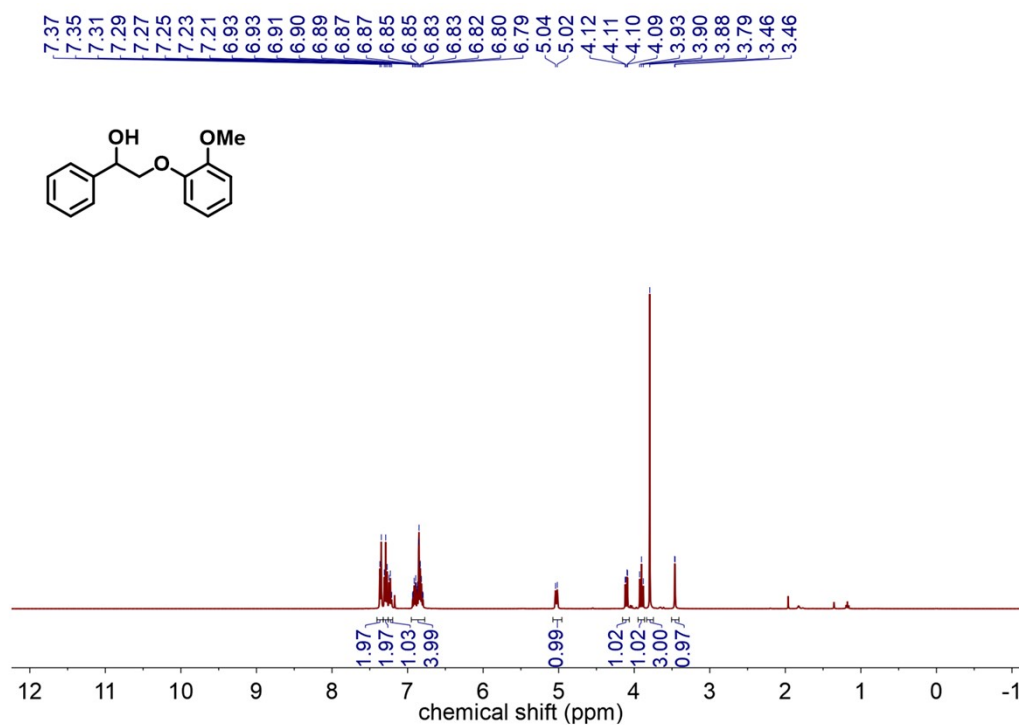

**Figure S17.**  $^1\text{H}$  NMR of 2-(2-Methoxyphenoxy)-1-phenylethanol.

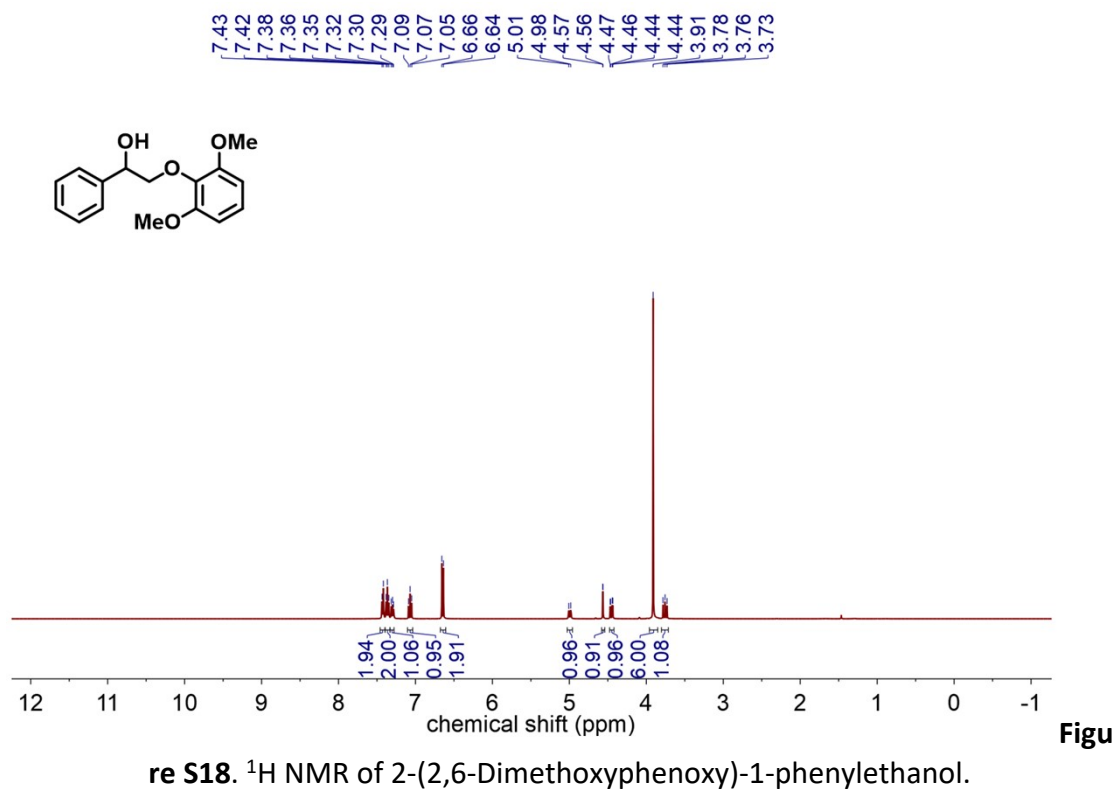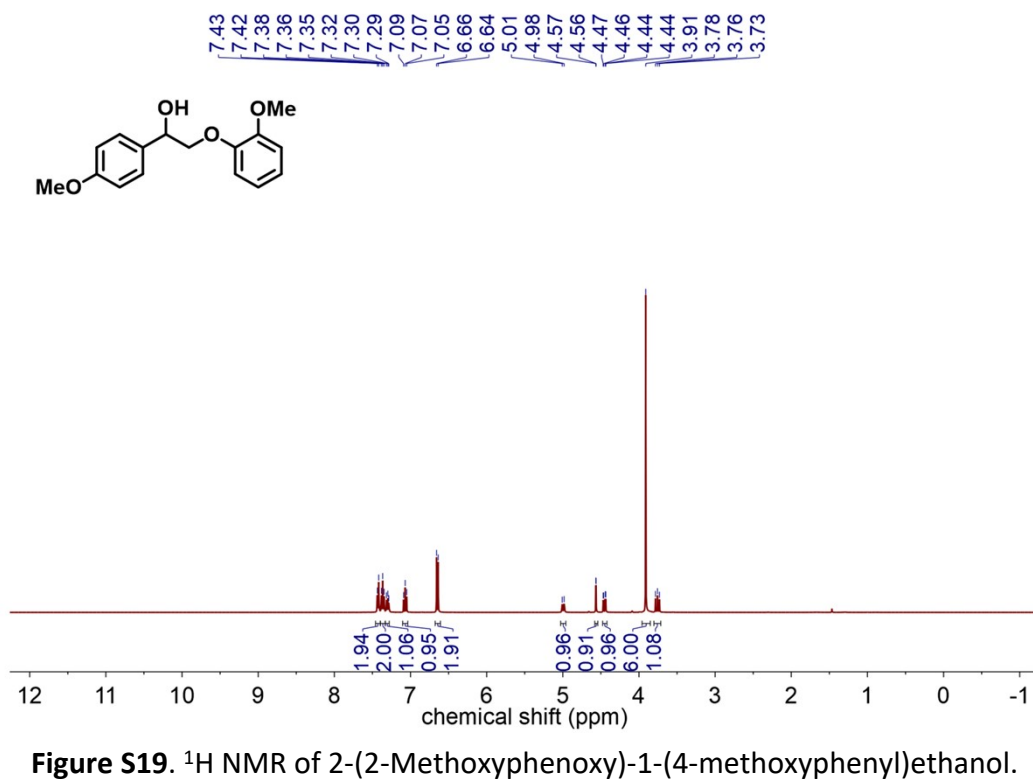

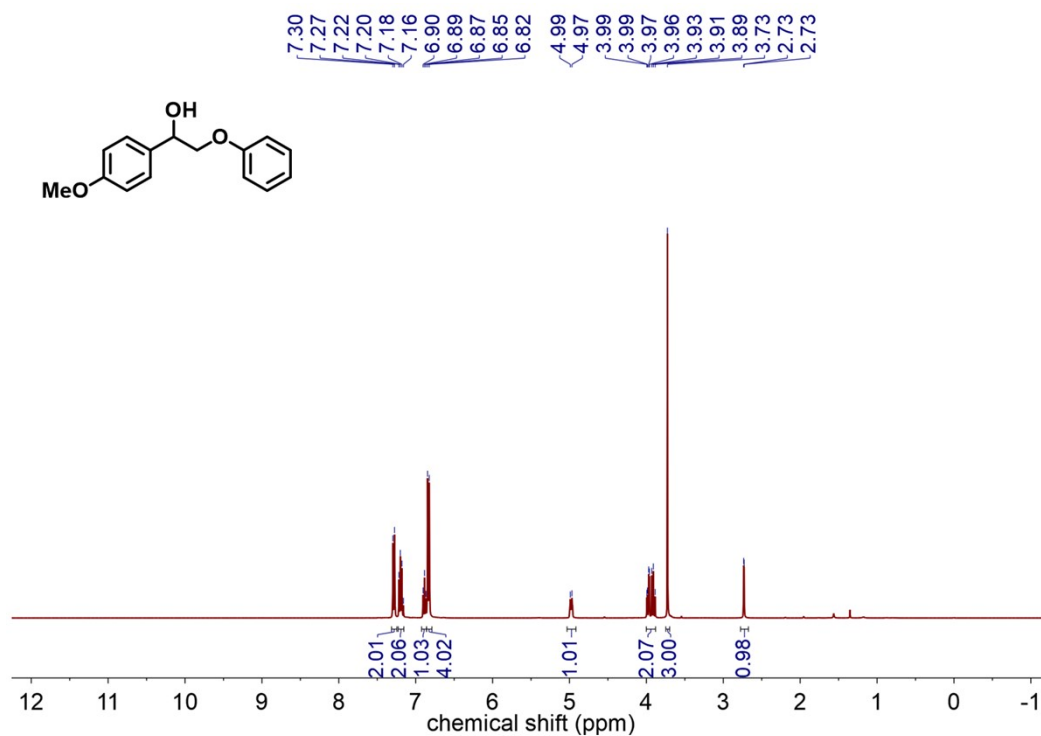

Figure S20.  $^1\text{H}$  NMR of 1-(4-Methoxyphenyl)-2-phenoxyethanol.

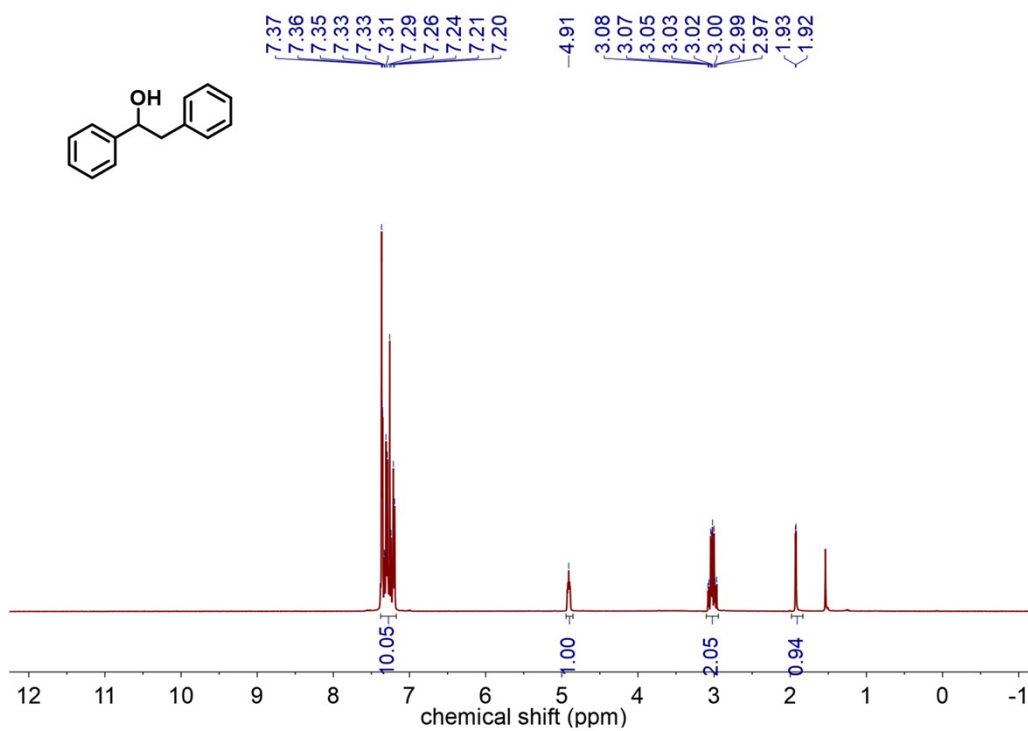

Figure S21.  $^1\text{H}$  NMR of 1,2-diphenylethanol

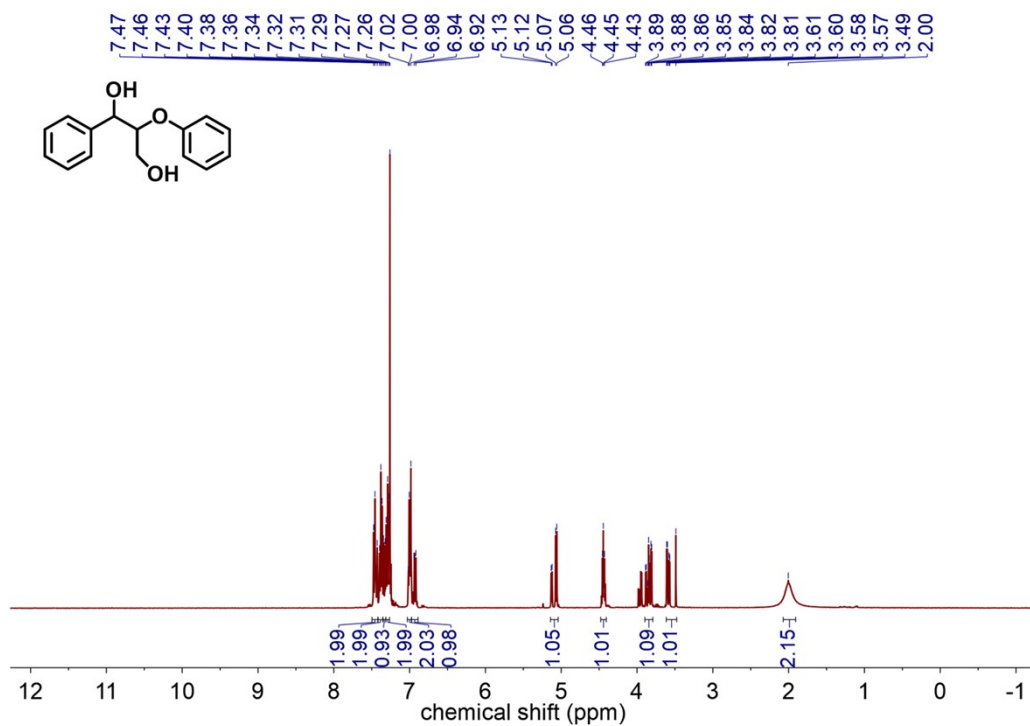

Figure S22.  $^1\text{H}$  NMR of 2-phenoxy-1-phenylpropane-1,3-diol

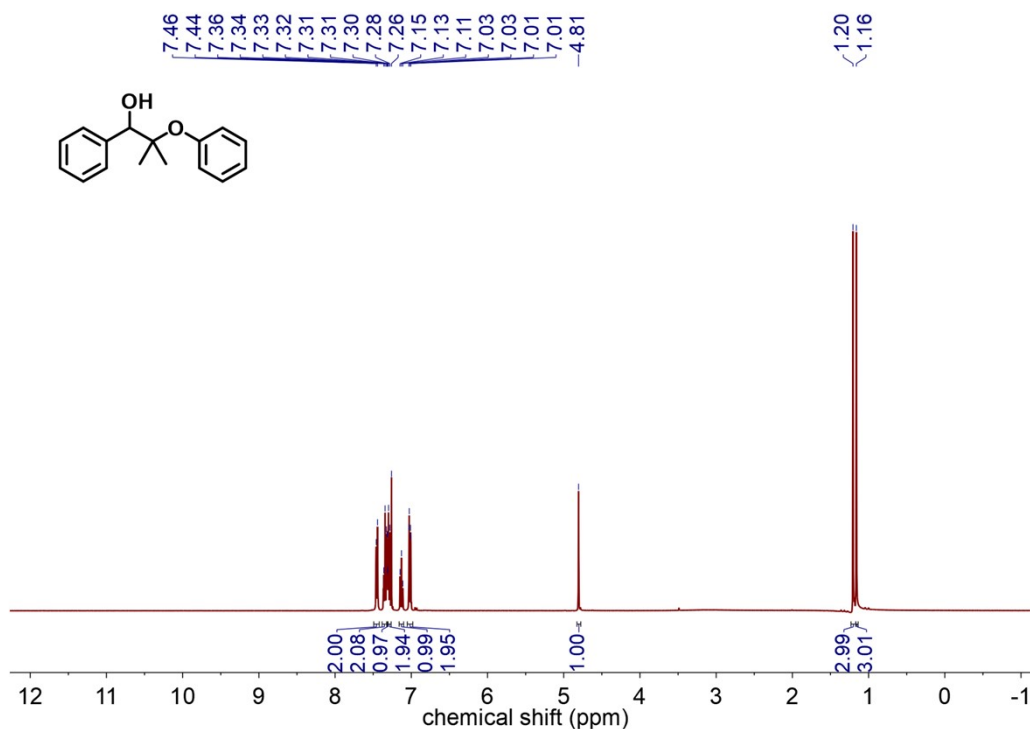

Figure S23.  $^1\text{H}$  NMR of 2-methyl-2-phenoxy-1-phenylpropan-1-ol

## References

- [1] Zhao, L.; Shi, S.; Zhu, G.; Liu, M.; Gao, J.; Xu, J. Au–Pd alloy cooperates with covalent triazine frameworks for the catalytic oxidative cleavage of  $\beta$ -O-4 linkages. *Green Chem.* **2019**, *21*, 6707-

6716.

- [2] Luo, H. H.; Wang, L. Y.; Li, G. S.; Shang, S. S.; Lv, Y.; Niu, J. Y.; Gao, S. Nitrogen-doped carbon-modified cobalt-nanoparticle-catalyzed oxidative cleavage of lignin  $\beta$ -O-4 model compounds under mild conditions. *ACS Sustain. Chem. Eng.* **2018**, *6*, 14188-14196.
- [3] Zhu, G. Z.; Shi, S.; Zhao, L.; Liu, M.; Gao, J.; Xu, J. Catalytic activation of carbon–hydrogen bonds in lignin linkages over strong-base-modified covalent triazine frameworks for lignin oxidative cleavage. *ACS Catal.* **2020**, *10*, 7526-7534.
- [4] Rahimi, A.; Azarpira, A.; Kim, H.; Ralph, J.; Stahl, S. S. Chemoselective Metal-Free Aerobic Alcohol Oxidation in Lignin. *J. Am. Chem. Soc.* **2013**, *135*, 6415-6418.
- [5] Deng, W.; Zhang, H.; Wu, X.; Li, R.; Zhang, Q.; Wang, Y. Oxidative conversion of lignin and lignin model compounds catalyzed by CeO<sub>2</sub>-supported Pd nanoparticles. *Green Chem.* **2015**, *17*, 5009-5018.
- [6] Song, W. L.; Dong, Q. M.; Hong, L.; Tian, Z. Q.; Tang, L. N.; Hao, W. L.; Zhang, H. X. Activating molecular oxygen with Au/CeO<sub>2</sub> for the conversion of lignin model compounds and organosolv lignin. *RSC Advances* **2019**, *9*, 31070-31077.
- [7] Lei, P.; Zhang, J.; Shen, W.; Zhong, M.; Guo, S. Boosting the catalytic performance of Ru nanoparticles in the cleavage of  $\beta$ -O-4 linkages in lignin by doping Mo. *Green Chem.* **2024**, *26*, 6616-6624.
- [8] Liu, S.; Bai, L.; van Muyden, A. P.; Huang, Z.; Cui, X.; Fei, Z.; Li, X.; Hu, X.; Dyson, P. J. Oxidative cleavage of  $\beta$ -O-4 bonds in lignin model compounds with a single-atom Co catalyst. *Green Chem.* **2019**, *21*, 1974-1981.
- [9] Sun, K.; Chen, S.; Zhang, J.; Lu, G. P.; Cai, C. Cobalt Nanoparticles Embedded in N-Doped Porous Carbon Derived from Bimetallic Zeolitic Imidazolate Frameworks for One-Pot Selective Oxidative Depolymerization of Lignin. *ChemCatChem* **2019**, *11*, 1264-1271.
- [10] Wang, M.; Lu, J. M.; Zhang, X. C.; Li, L. H.; Li, H. J.; Luo, N. C.; Wang, F. Two-step, catalytic C–C bond oxidative cleavage process converts lignin models and extracts to aromatic acids. *ACS Catal.* **2016**, *6*, 6086-6090.
- [11] Wang, Y.; Ding, B.; He, J.; Ding, Z.; Hou, Z. Ionic Liquid-Stabilizing Vanadium Oxo-Cluster Catalysts for One-Step Selective Oxidative Cleavage of  $\beta$ -O-4 Lignin Model Compounds. *Energy & Fuels* **2023**, *37*, 5429-5440.
- [12] Hanson, S. K.; Baker, R. T.; Gordon, J. C.; Scott, B. L.; Thorn, D. L. Aerobic Oxidation of Lignin Models Using a Base Metal Vanadium Catalyst. *Inorg. Chem.* **2010**, *49*, 5611-5618.
- [13] Tian, H. R.; Liu, Y. W.; Zhang, Z.; Liu, S. M.; Dang, T. Y.; Li, X. H.; Sun, X. W.; Lu, Y.; Liu, S. X. A multicentre synergistic polyoxometalate-based metal–organic framework for one-step selective oxidative cleavage of  $\beta$ -O-4 lignin model compounds. *Green Chem.* **2020**, *22*, 248-255.
- [14] Li, Y.; Zhang, X.; Li, Z.; Song, J.; Wang, X. Full Utilization of Lignocellulose with Ionic Liquid Polyoxometalates in a One-Pot Three-Step Conversion. *ChemSusChem* **2019**, *12*, 4936-4945.
- [15] Xin, X.; Li, Z.; Chi, M.; Zhang, M.; Dong, Y.; Lv, H.; Yang, G.-Y. A recoverable polyoxometalate-ionic liquid catalyst for selective cleavage of lignin  $\beta$ -O-4 models under mild conditions. *Green Chem.* **2023**, *25*, 2815-2824.
- [16] Li, Z.; Li, Y.; Chen, Y.; Wang, Q.; Jadoon, M.; Yi, X.; Duan, X.; Wang, X. Developing Dawson-Type Polyoxometalates Used as Highly Efficient Catalysts for Lignocellulose Transformation. *ACS Catal.* **2022**, *12*, 9213-9225.
- [17] Li, J.; Li, Z.; Dong, J.; Fang, R. B.; Chi, Y. N.; Hu, C. W. Hexaniobate as a Recyclable Solid Base

Catalyst to Activate C–H Bonds in Lignin Linkage Boosting the Production of Aromatic Monomers. *ACS Catal.* **2023**, *13*, 5272-5284.

[18] Zhao, L.; Shi, S.; Liu, M.; Zhu, G.; Wang, M.; Du, W.; Gao, J.; Xu, J. Covalent triazine framework catalytic oxidative cleavage of lignin models and organosolv lignin. *Green Chem.* **2018**, *20*, 1270-1279.

[19] Wang, M.; Li, L. H.; Lu, J. M.; Li, H. J.; Zhang, X. C.; Liu, H. F.; Luo, N. C.; Wang, F. Acid promoted C–C bond oxidative cleavage of  $\beta$ -O-4 and  $\beta$ -1 lignin models to esters over a copper catalyst. *Green Chem.* **2017**, *19*, 702-706.

[20] Hu, Y. Z.; Yan, L.; Zhao, X. L.; Wang, C. G.; Li, S.; Zhang, X. H.; Ma, L. L.; Zhang, Q. Mild selective oxidative cleavage of lignin C–C bonds over a copper catalyst in water. *Green Chem.* **2021**, *23*, 7030-7040.

[21] Li, L. X.; Kong, J. H.; Zhang, H. M.; Liu, S. J.; Zeng, Q.; Zhang, Y. Q.; Ma, H.; He, H. Y.; Long, J. X.; Li, X. H. Selective aerobic oxidative cleavage of lignin C-C bonds over novel hierarchical Ce-Cu/MFI nanosheets. *Appl. Catal. B: Environ.* **2020**, *279*, 119343-119358.

[22] Guo, S.; Tong, X.; Meng, L.; Yang, G. A sustainable iron-catalyzed aerobic oxidative C–C and C–O bond cleavage of a lignin model to phenol and methyl benzoate. *Catal. Sci. & Technol.* **2023**, *13*, 1748-1754.
